# Supplementary material for: A Summer Academic Research Experience for Disadvantaged Youth
Source: Atypon-hosted journal article supplement (doi:10.1187/cbe.12-12-0206), 2013-09-01
Supplement: combinedsupmats1.pdf [file combinedsupmats1.pdf]

# Supplemental Material

*CBE—Life Sciences Education*

**Kabacoff et al.**

## **A Summer Academic Research Experience for Disadvantaged Youth**

**Cathryn Kabacoff<sup>1</sup>, Vasudha Srivastava<sup>1,2</sup>, and Douglas N. Robinson<sup>1,2</sup>**

<sup>1</sup>Department of Cell Biology, Johns Hopkins School of Medicine, 725 N. Wolfe St., Baltimore, MD 21205; <sup>2</sup>Department of Chemical and Biomolecular Engineering, Johns Hopkins Whiting School of Engineering, Baltimore, MD 21218

### **Summary of Supplemental Materials**

Scientific Writing Syllabus

Essay Writing Syllabus

Exit Survey Questions for SARE

Mathematics Pre-assessment Test

Mathematics Post-assessment Test

Writing Class Evaluation Survey

Lab Science Introduction Syllabus

**Guide to Professionalism**

## **Scientific Writing Syllabus**

1. Essential: How to keep a scientific notebook, taking notes, writing a formal e-mail, general expectations
2. Scientific method
3. What is scientific writing?
4. Style of scientific writing
5. How to write a lab report
6. Prewriting: Paper/Poster
7. Composition of a scientific paper: IMRAD format
8. Ethics in scientific publishing: Citations and Plagiarism
9. Materials and methods
10. Results
11. Graphing with Excel
12. Figures and Tables: How to design effective tables and graphs
13. Discussion
14. Introduction: Funnel Method
15. Title and abstract
16. Summarizing a scientific article
17. References
18. Acknowledgements
19. Poster requirements
20. Setting up a poster
21. Work on poster
22. Practice presenting poster
23. Poster Presentation

## **Essay Writing Syllabus**

The following essay topics were used for writing class. A general theme was required for each essay, but the topic remained the choice of the student.

1. Pre-assessment: Students were given the college application essays for their top college choice. They picked the topic that interested them the most.
2. Recalling an experience: Students wrote an essay about a personal experience.
3. Lab Report: Group Writing. The topic was "Measuring the Protein Concentration of a Cell Lysate."
4. Compare/Contrast. Students picked a topic that interested them and discussed similarities and differences
5. Cause/Effect: Students had a choice of whether to concentrate on causes or effects.
6. Introduction to the Poster: This is a first draft for their poster presentation. The purpose is to provide background for the scientific research they have been doing this summer.

7. Post-assessment: Reflection Essay- students reflected on their summer experience.

**Exit Survey Questions for SARE**

Please circle the number that indicates your current **interest** level in the areas below:

|                                                                            | low <span style="float:right">high</span> |   |   |   |   |   |
|----------------------------------------------------------------------------|-------------------------------------------|---|---|---|---|---|
| Understanding the principles of biology                                    | 0                                         | 1 | 2 | 3 | 4 | 5 |
| Being able to understand advances in science                               | 0                                         | 1 | 2 | 3 | 4 | 5 |
| Pursuing a career in science                                               | 0                                         | 1 | 2 | 3 | 4 | 5 |
| Using the internet as a learning tool                                      | 0                                         | 1 | 2 | 3 | 4 | 5 |
| Using a computer to analyze data and understand mathematical relationships | 0                                         | 1 | 2 | 3 | 4 | 5 |
| Understanding graphs                                                       | 0                                         | 1 | 2 | 3 | 4 | 5 |

Please circle the number that represents your **current confidence** level in areas below:

|                                                                                                     | low <span style="float:right">high</span> |   |   |   |   |   |
|-----------------------------------------------------------------------------------------------------|-------------------------------------------|---|---|---|---|---|
| Understanding biological concepts                                                                   | 0                                         | 1 | 2 | 3 | 4 | 5 |
| Reading a scientific article                                                                        | 0                                         | 1 | 2 | 3 | 4 | 5 |
| Summarizing a scientific article                                                                    | 0                                         | 1 | 2 | 3 | 4 | 5 |
| Reading an abstract for information about a paper                                                   | 0                                         | 1 | 2 | 3 | 4 | 5 |
| Skimming a scientific paper                                                                         | 0                                         | 1 | 2 | 3 | 4 | 5 |
| Using PowerPoint                                                                                    | 0                                         | 1 | 2 | 3 | 4 | 5 |
| Writing an organized paragraph                                                                      | 0                                         | 1 | 2 | 3 | 4 | 5 |
| Writing a 5 paragraph essay                                                                         | 0                                         | 1 | 2 | 3 | 4 | 5 |
| Comfortable writing a paper a section at a time out of order, not necessarily from beginning to end | 0                                         | 1 | 2 | 3 | 4 | 5 |
| Recognizing plagiarism                                                                              | 0                                         | 1 | 2 | 3 | 4 | 5 |
| Knowing how to cite references                                                                      | 0                                         | 1 | 2 | 3 | 4 | 5 |

Please circle the number that represents your **degree of agreement** with these statements:

|                                                                                                            | low |   |   |   |   | high |
|------------------------------------------------------------------------------------------------------------|-----|---|---|---|---|------|
| The ultimate purpose of doing science is publishing your new results.                                      | 0   | 1 | 2 | 3 | 4 | 5    |
| The purpose of scientific writing is to communicate new scientific findings.                               | 0   | 1 | 2 | 3 | 4 | 5    |
| Scientific writing should be very complex so everyone appreciates how hard it is to do.                    | 0   | 1 | 2 | 3 | 4 | 5    |
| A key characteristic of scientific writing is clarity.                                                     | 0   | 1 | 2 | 3 | 4 | 5    |
| Writing can have many different purposes and audiences.                                                    | 0   | 1 | 2 | 3 | 4 | 5    |
| IMRAD is an acceptable format for a scientific paper.                                                      | 0   | 1 | 2 | 3 | 4 | 5    |
| The Introduction explains the problem being addressed.                                                     | 0   | 1 | 2 | 3 | 4 | 5    |
| The Methods section describes how you went about solving the problem.                                      | 0   | 1 | 2 | 3 | 4 | 5    |
| The Results section tells what new knowledge you have to report.                                           | 0   | 1 | 2 | 3 | 4 | 5    |
| The Discussion section explains what the findings mean.                                                    | 0   | 1 | 2 | 3 | 4 | 5    |
| A science paper is best read from beginning to end.                                                        | 0   | 1 | 2 | 3 | 4 | 5    |
| A scientist always writes a paper in order, starting with the introduction and ending with the discussion. | 0   | 1 | 2 | 3 | 4 | 5    |
| The sequence of lessons in Writing Class flowed logically, helping you to write the poster.                | 0   | 1 | 2 | 3 | 4 | 5    |
| The expectations in Writing Class were clear to me.                                                        | 0   | 1 | 2 | 3 | 4 | 5    |
| The pace of the program was acceptable.                                                                    | 0   | 1 | 2 | 3 | 4 | 5    |
| Regardless of my ultimate career path, the professional skills I worked on here will be useful             | 0   | 1 | 2 | 3 | 4 | 5    |
| I recognize that professionalism encompasses reliability, responsibility, and respect.                     | 0   | 1 | 2 | 3 | 4 | 5    |

Adapted from:

[http://www.edcenter.sdsu.edu/projects/assessment/Potential\\_course\\_survey\\_questions.htm](http://www.edcenter.sdsu.edu/projects/assessment/Potential_course_survey_questions.htm)

### Mathematics Pre-assessment Test

1. Calculate  $(4 - 3)(1 - (3 + 5)) \times 9$
2. Calculate  $\frac{3}{4} \times \frac{2}{15} + 2\left(\frac{1}{3} - \frac{2}{5}\right)$
3. Simplify  $7(1 + 9v) - 8(5v - 6)$
4. Solve for x:  $-3(1 + 6x) = 14 - x$
5. Solve for x:  $12(x - 12) = 9(1 + 7x)$
6. Factorize  $12a^2 - 9a^2 + 4a - 3$
7. Factorize  $12xy - 28x - 15y + 35$
8. Factorize  $x^2 - 16x + 63$
9. Factorize  $7x^2 - 45x - 28$
10. Simplify  $-3\sqrt{12} + 4\sqrt{3} - 2\sqrt{6}$
11. Simplify  $4\sqrt{15(\sqrt{6} + \sqrt{5})}$
12. Solve using the quadratic formula  $2x^2 - 5x + 3 = 0$
13. Plot the graph for  $2x + y = 5$
14. Plot the graph for  $y \leq x^2$

## Mathematics Final Assessment Test

### Instructions:

- Please read the questions carefully and write down all the steps involved in solving the problem.
- Please use pencils to write your answers

1. Calculate  $(3 - 3)(2 - (3 + 5)) \times 4$

2. Calculate  $\frac{1}{4} \times \frac{6}{15} + 2 \left( \frac{1}{3} - \frac{5}{6} \right)$

3. Simplify  $7(1 + 5v) + 8(-3v + 4)$

4. Solve for x:  $2(x - 12) = 9(1 + 5x)$

5. Factorize  $12a^2 - 9a^2 + 4a - 3$

6. Factorize  $12xy - 28x - 15y + 35$

7. Factorize  $x^2 - 20x + 84$

8. Factorize  $7x^2 - 49x - 28$

9. Factorize  $2x^4 - 9x^2 + 9$

10. Simplify  $4\sqrt{15} \cdot (\sqrt{6} + \sqrt{5})$

11. Solve using the quadratic formula  $3x^2 - 5x + 2 = 0$

12. Given below are two datasets representing the marks obtained by students in two classes:

Section A: 30, 25, 45, 30, 45, 35, 40, 38, 43, 47

Section B: 25, 32, 27, 35, 37, 42, 28, 30, 38, 45

Calculate the mean, median, range, variance and standard deviation for both the datasets.

Which class has performed better?

The students from which class have a tighter spread in marks?

13. Find the following trigonometric ratios:

a.  $\sin(180^\circ)$

b.  $\sec(225^\circ)$

- c.  $\tan (-60^\circ)$
- d.  $\cos (-120^\circ)$
- e.  $\csc (150^\circ)$
- f.  $\cot (270^\circ)$

14. For the given triangle, find the following using trigonometric ratios

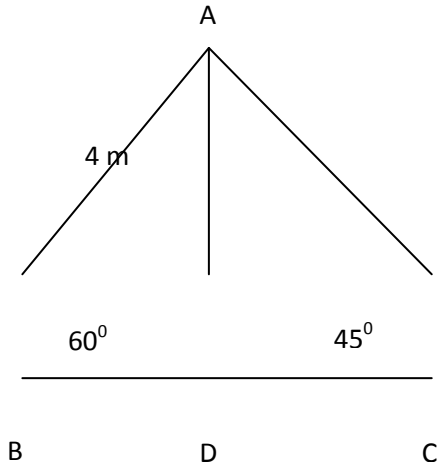

- AD =
- BD =
- AC =
- CD =
- BC =

15. Identify the roots and plot the graph for  $y = x(x + 1)(x + 2)$

16. Identify the roots and plot the graph for  $y = x^2 - 3x + 2$

**Writing Class Evaluation Survey**

- 1. Strongly Disagree
- 2. Disagree
- 3. Undecided
- 4. Agree
- 5. Strongly Agree

Writing Course

|                                                                 |   |   |   |   |   |
|-----------------------------------------------------------------|---|---|---|---|---|
| The material covered was relevant to the needs of the scholars. | 1 | 2 | 3 | 4 | 5 |
|-----------------------------------------------------------------|---|---|---|---|---|

|                                                                             |   |   |   |   |   |
|-----------------------------------------------------------------------------|---|---|---|---|---|
| This class met my expectations.                                             | 1 | 2 | 3 | 4 | 5 |
| This class furthered my knowledge of writing, including scientific writing. | 1 | 2 | 3 | 4 | 5 |
| This class made me feel more confident doing my poster.                     | 1 | 2 | 3 | 4 | 5 |
| This class will help me in my writing when I return to school.              | 1 | 2 | 3 | 4 | 5 |
| I enjoyed taking this class.                                                | 1 | 2 | 3 | 4 | 5 |

Class Instructor

|                                                        |   |   |   |   |   |
|--------------------------------------------------------|---|---|---|---|---|
| The instructor was helpful and friendly.               | 1 | 2 | 3 | 4 | 5 |
| The instructor was able to teach me at my level.       | 1 | 2 | 3 | 4 | 5 |
| The instructor showed enthusiasm in giving this class. | 1 | 2 | 3 | 4 | 5 |
| The instructor made each session enjoyable.            | 1 | 2 | 3 | 4 | 5 |
| I would take another class given by this instructor    | 1 | 2 | 3 | 4 | 5 |

Class Instructor

|                                                        |   |   |   |   |   |
|--------------------------------------------------------|---|---|---|---|---|
| The instructor was helpful and friendly.               | 1 | 2 | 3 | 4 | 5 |
| The instructor was able to teach me at my level.       | 1 | 2 | 3 | 4 | 5 |
| The instructor showed enthusiasm in giving this class. | 1 | 2 | 3 | 4 | 5 |
| The instructor made each session enjoyable.            | 1 | 2 | 3 | 4 | 5 |
| I would take another class given by this instructor    | 1 | 2 | 3 | 4 | 5 |

Adapted from <http://surveymonkey.com>

Please answer the questions below.

1. What did you like the most about SARE?
2. What could improve the program?



### **Introduction to Chemistry and Biology Syllabus (ten one-hour sessions)**

1. Basic Lab Chemistry: Concentrations, dilutions, metric units, pipetting
2. Acid-Base Titrations
3. Cells: Prokaryotes and eukaryotes, phylogeny, cell organization and structure
4. Biomolecules
5. Central Dogma: DNA, RNA, and protein
6. Genetics
7. Cloning Techniques: Plasmids and transformations
8. Cloning Techniques: Restriction enzymes, ligation, polymerase chain reaction
9. Electrophoresis: Protein and DNA, practice gel-loading
10. Basics of Microscopy

## Guide to Professionalism

|                                                                                                                          | <b>Needs Professionalism</b>                                                                                                                                                                                                                                                                                                                            | <b>Professional in training</b>                                                                                                                                                                                                                                                                                 |
|--------------------------------------------------------------------------------------------------------------------------|---------------------------------------------------------------------------------------------------------------------------------------------------------------------------------------------------------------------------------------------------------------------------------------------------------------------------------------------------------|-----------------------------------------------------------------------------------------------------------------------------------------------------------------------------------------------------------------------------------------------------------------------------------------------------------------|
| <p><b>Character</b><br/>Character is who you are and what you stand for.</p>                                             | <ul style="list-style-type: none"> <li>• Settle for mediocrity</li> <li>• Expect it to be easy</li> <li>• Make or seek excuses</li> <li>• Arrive late or not at all</li> <li>• Deliver work late</li> <li>• Go back on your word</li> <li>• Hide from your mistakes</li> <li>• Be a slacker</li> </ul>                                                  | <ul style="list-style-type: none"> <li>• Hold yourself to the highest standards</li> <li>• Make a commitment to grow continually</li> <li>• Raise the bar on what you expect of yourself</li> <li>• Take pride in yourself and your work</li> </ul>                                                             |
| <p><b>Attitude</b><br/>They put passion into their work and begin everything with an aura of confidence and quality.</p> | <ul style="list-style-type: none"> <li>• Wait for someone to push you or prod you along</li> <li>• Dwell on setbacks or obstacles</li> <li>• Assume that someone else will take care of you</li> <li>• Always complain or become discouraged</li> <li>• Be a Quitter</li> </ul>                                                                         | <ul style="list-style-type: none"> <li>• Rise above the crowd</li> <li>• Be a self starter</li> <li>• Maintain a positive attitude</li> <li>• Express your energy and enthusiasm</li> <li>• Spring back from setbacks</li> <li>• Be courteous, friendly and considerate</li> <li>• Be eager to learn</li> </ul> |
| <p><b>Excellence</b><br/>Strive to be the best that they can be.</p>                                                     | <ul style="list-style-type: none"> <li>• Tolerate mediocrity from yourself and others</li> <li>• Turn in work that is incomplete or inferior</li> <li>• Fail to do homework</li> <li>• Does not attempt to put forth an effort</li> </ul>                                                                                                               | <ul style="list-style-type: none"> <li>• Raise the bar</li> <li>• Check your work and complete it in all respects</li> <li>• Pay attention to detail</li> <li>• Redo work that does not meet your standards</li> </ul>                                                                                          |
| <p><b>Competency</b><br/>They understand the requirements and responsibilities of their job.</p>                         | <ul style="list-style-type: none"> <li>• Take a half-hearted or apathetic approach</li> <li>• Be afraid to make mistakes or ask questions</li> <li>• Forget to practice</li> <li>• Accept less than your personal best</li> <li>• Waste your time and that of your colleagues</li> </ul>                                                                | <ul style="list-style-type: none"> <li>• Learn and understand the requirements of your job</li> <li>• Make sure you understand what is expected of you</li> <li>• Press yourself to improve your performance and your results</li> </ul>                                                                        |
| <p><b>Conduct</b><br/>Professionals are mature. They develop social skills and an appreciation for others.</p>           | <ul style="list-style-type: none"> <li>• Lose your temper or act in a violent manner</li> <li>• Get defensive or argumentative</li> <li>• Roll your eyes, glare, smirk</li> <li>• Keep others waiting</li> <li>• Say or do anything rude, hurtful or mean</li> <li>• Undermine authority of others</li> <li>• Use cell phone inappropriately</li> </ul> | <ul style="list-style-type: none"> <li>• Act in a professional manner at all times</li> <li>• Establish eye contact</li> <li>• Arrive on time</li> <li>• Take steps to manage your time well</li> <li>• Develop good work habits</li> <li>• Gives tremendous respect to colleagues</li> </ul>                   |

Adapted from: [www.rcampus.com/rubricshowc.cfm](http://www.rcampus.com/rubricshowc.cfm)
